# Supplementary material for: miR-146b suppresses LPS-induced M1 macrophage polarization via inhibiting the FGL2-activated NF-κB/MAPK signaling pathway in inflammatory bowel disease
Source: PubMed Central journal article supplement (PMC9234609; doi:10.1016/j.clinsp.2022.100069), 2022-06-21
Supplement: mmc1.pdf [file mmc1.pdf]

## CLINICS-2021-3688\_Supplementary Material

**Supplementary Table 1** Sequences of siRNA against specific targets.

|           |       |                         |
|-----------|-------|-------------------------|
| si-FGL2-1 | 5'-3' | aacaatgaaacagaggaaattaa |
| si-FGL2-2 | 5'-3' | gtgataacagagttagagaatta |

**Supplementary Table 2** Sequences of PCR primers used in this study.

|          |                 |                         |
|----------|-----------------|-------------------------|
| GAPDH    | Forward (5'-3') | TGTGGGCATCAATGGATTTGG   |
|          | Reverse (5'-3') | ACACCATGTATTCCGGGTCAAT  |
| miR-146b | Forward (5'-3') | TGACCCATCCTGGGCCTCAA    |
|          | Reverse (5'-3') | CCAGTGGGCAAGATGTGGGCC   |
| FGL2     | Forward (5'-3') | GCCAAATGTGAGTCCCTGGAA   |
|          | Reverse (5'-3') | TTCCACCCAAGAGCACGTTTAAG |
